CORRECTION

# Correction: Actinobacteria Isolated from an Underground Lake and Moonmilk Speleothem from the Biggest Conglomeratic Karstic Cave in Siberia as Sources of Novel Biologically Active Compounds

Denis V. Axenov-Gribanov, Irina V. Voytsekhovskaya, Bogdan T. Tokovenko, Eugeni S. Protasov, Stanislav V. Gamaunov, Yuriy V. Rebets, Andriy N. Luzhetskyy, Maxim A. Timofeyev

The first author's name is spelled incorrectly. The correct name is: Denis V. Axenov-Gribanov. The correct citation is: Axenov-Gribanov DV, Voytsekhovskaya IV, Tokovenko BT, Protasov ES, Gamaunov SV, Rebets YV, et al. (2016) Actinobacteria Isolated from an Underground Lake and Moonmilk Speleothem from the Biggest Conglomeratic Karstic Cave in Siberia as Sources of Novel Biologically Active Compounds. PLoS ONE 11(2): e0149216. doi:[10.1371/journal.pone.0149216](https://doi.org/10.1371/journal.pone.0149216)

## Reference

1. Axenov-Gribanov DV, Voytsekhovskaya IV, Tokovenko BT, Protasov ES, Gamaunov SV, Rebets YV, et al. (2016) Actinobacteria Isolated from an Underground Lake and Moonmilk Speleothem from the Biggest Conglomeratic Karstic Cave in Siberia as Sources of Novel Biologically Active Compounds. PLoS ONE 11(2): e0149216. doi:[10.1371/journal.pone.0149216](https://doi.org/10.1371/journal.pone.0149216) PMID: [26901168](https://pubmed.ncbi.nlm.nih.gov/26901168/)

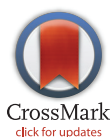

## OPEN ACCESS

**Citation:** Axenov-Gribanov DV, Voytsekhovskaya IV, Tokovenko BT, Protasov ES, Gamaunov SV, Rebets YV, et al. (2016) Correction: Actinobacteria Isolated from an Underground Lake and Moonmilk Speleothem from the Biggest Conglomeratic Karstic Cave in Siberia as Sources of Novel Biologically Active Compounds. PLoS ONE 11(3): e0152957. doi:[10.1371/journal.pone.0152957](https://doi.org/10.1371/journal.pone.0152957)

**Published:** March 30, 2016

**Copyright:** © 2016 Axenov-Gribanov et al. This is an open access article distributed under the terms of the [Creative Commons Attribution License](https://creativecommons.org/licenses/by/4.0/), which permits unrestricted use, distribution, and reproduction in any medium, provided the original author and source are credited.
